# Supplementary material
Source: PubMed Central journal article supplement (PMC4841918)

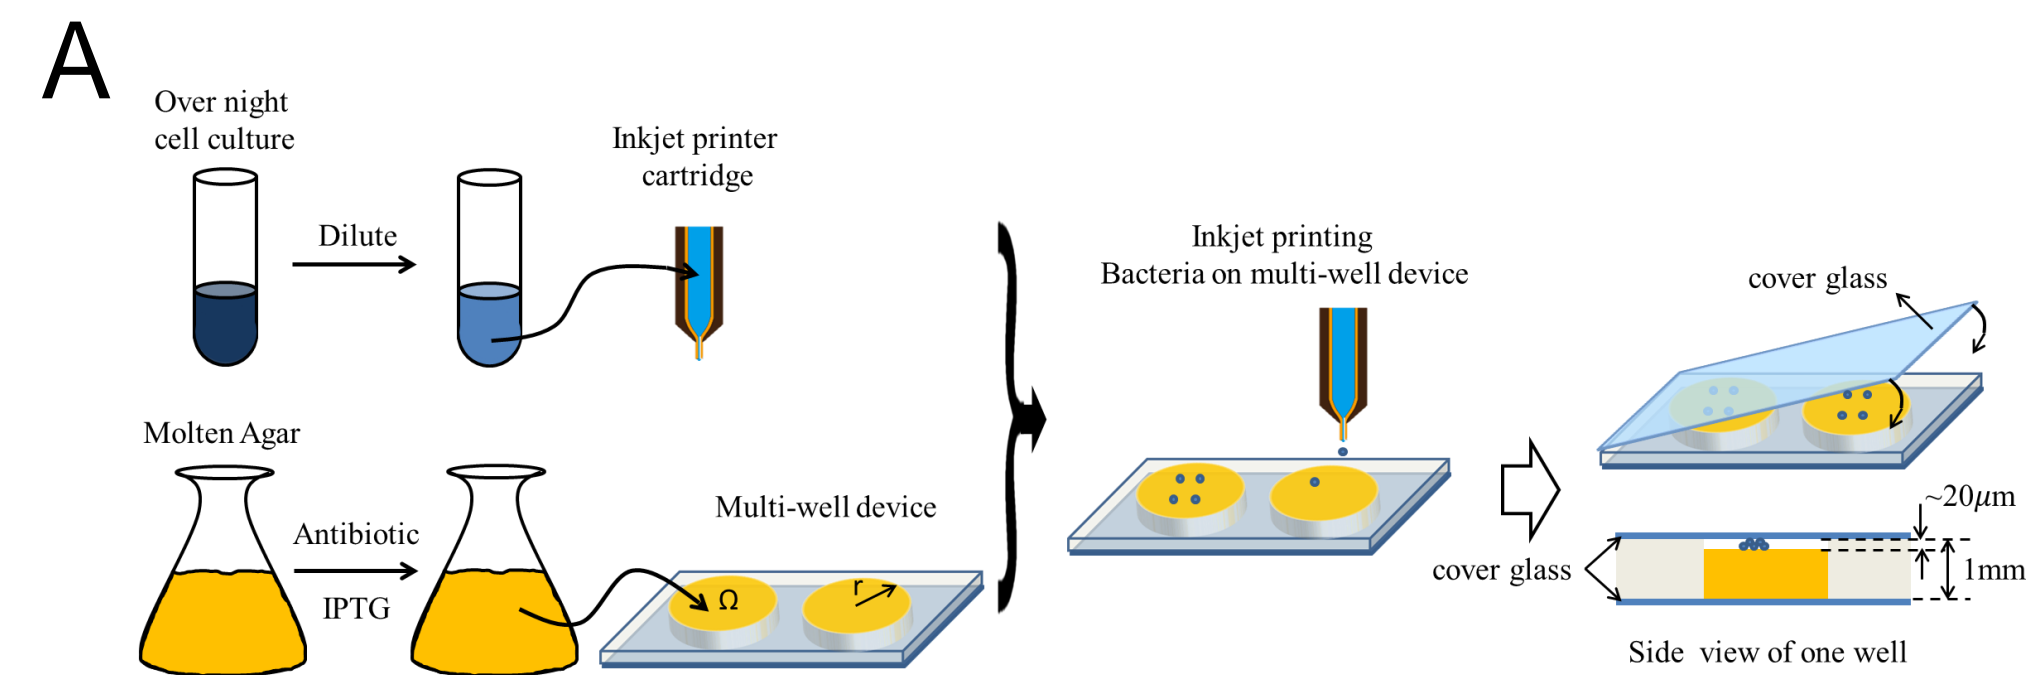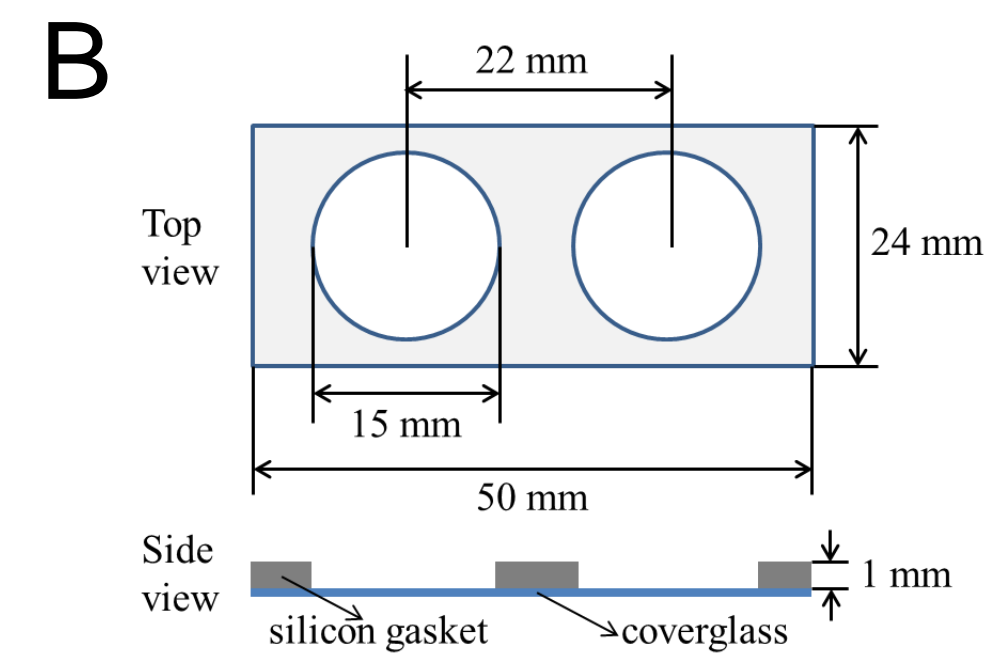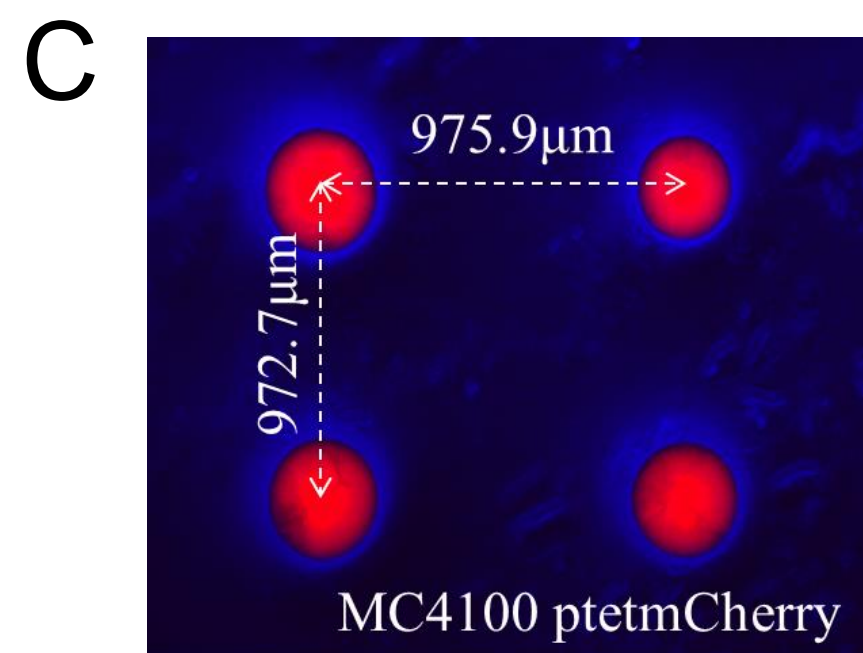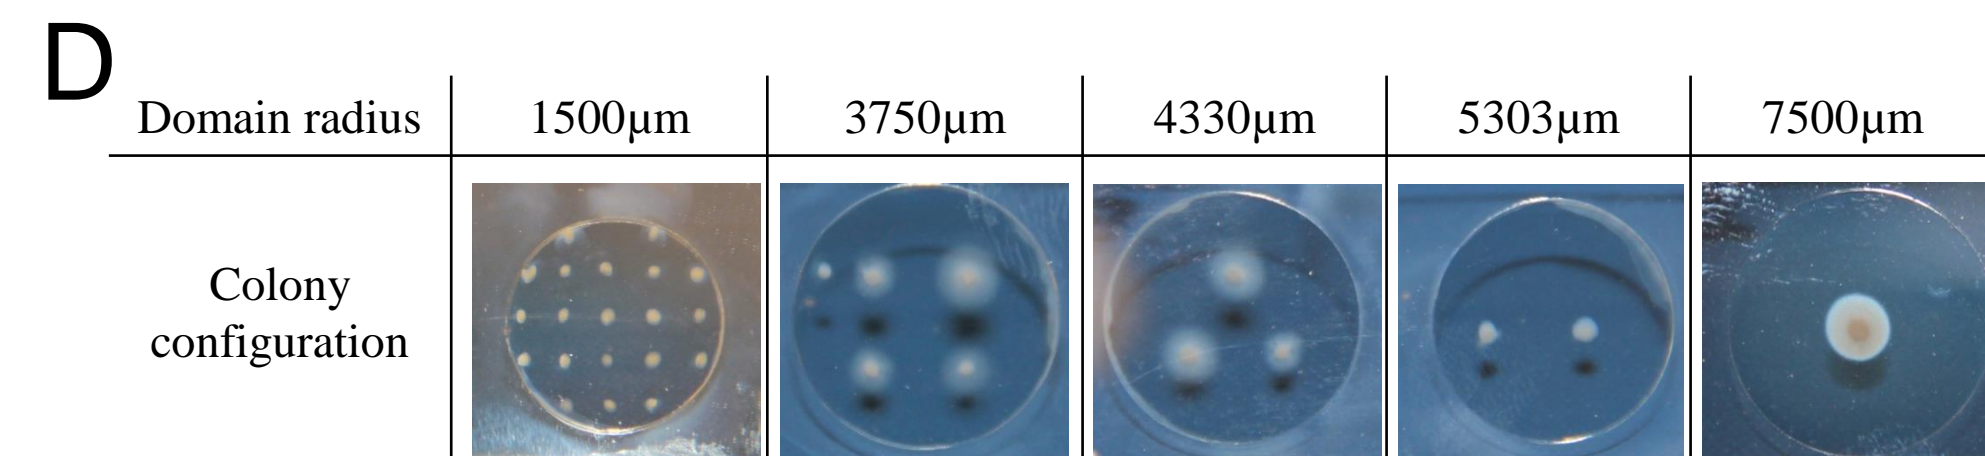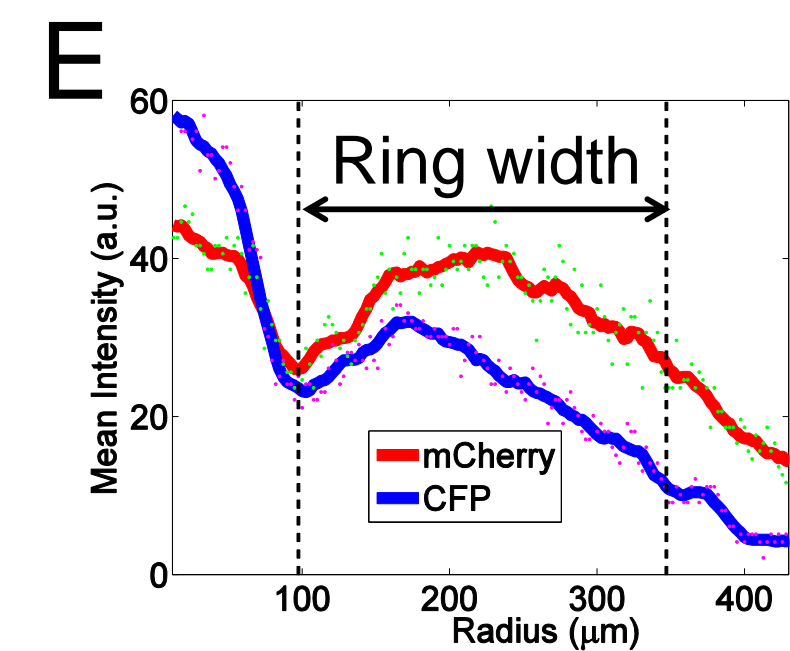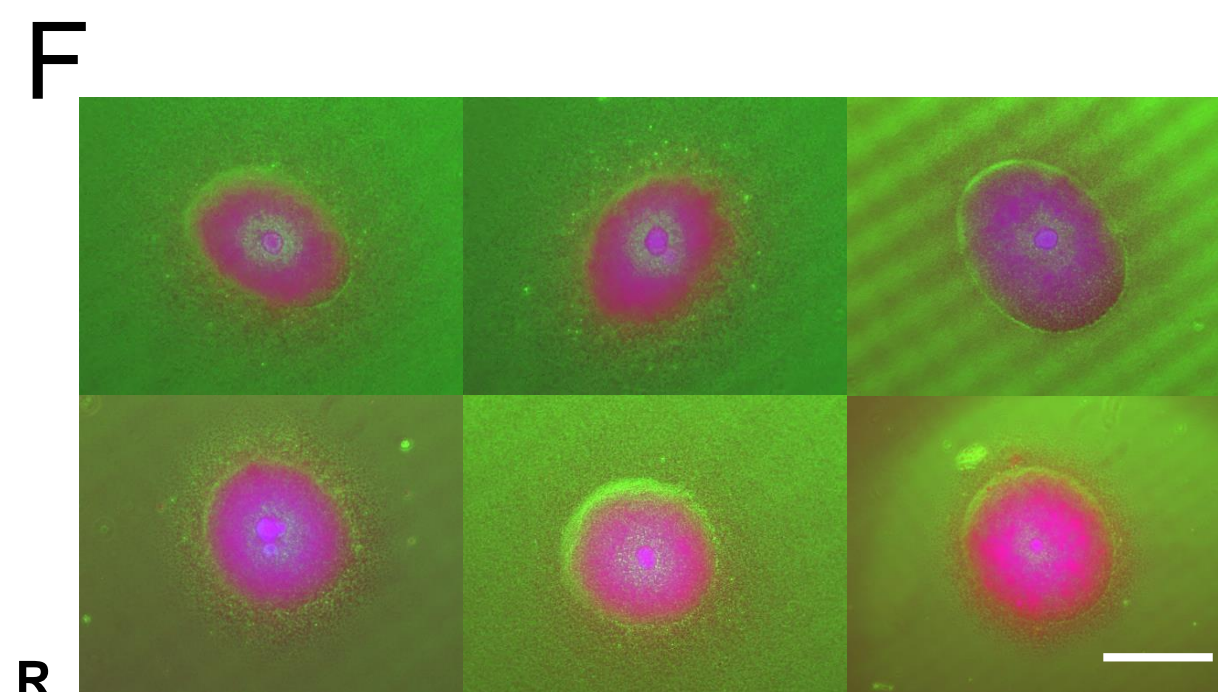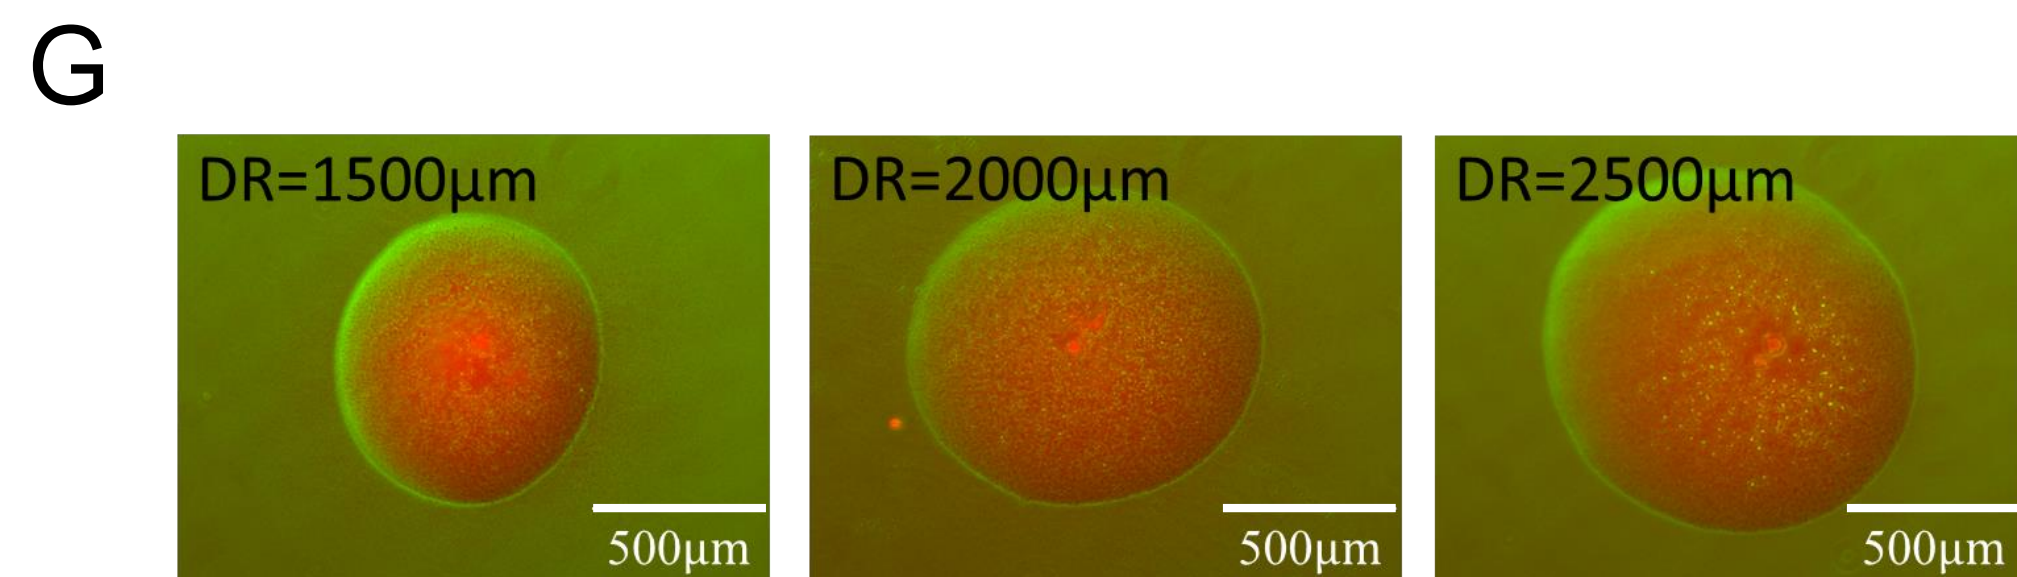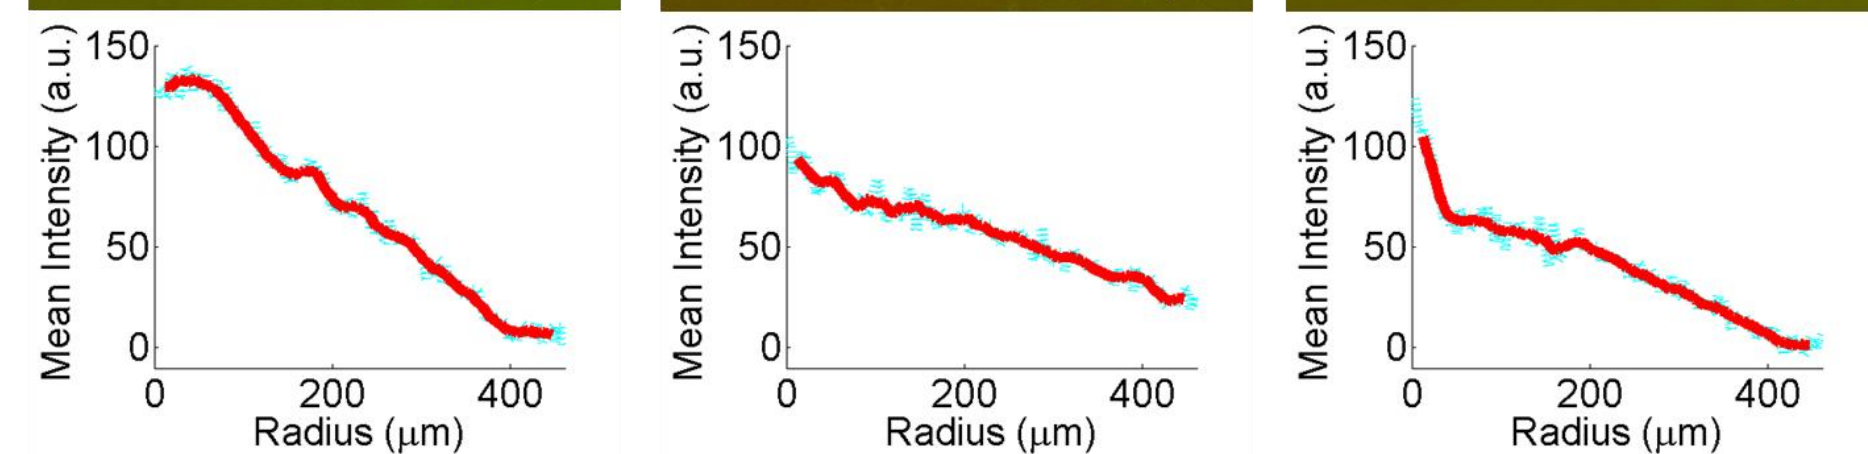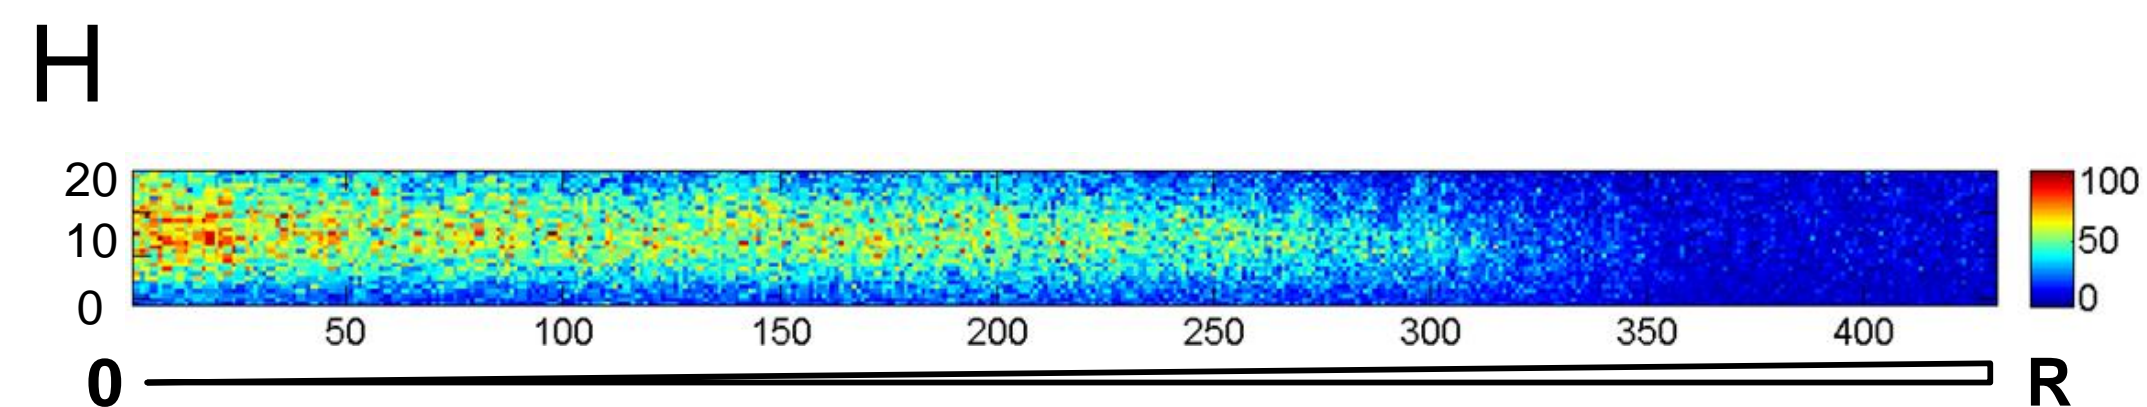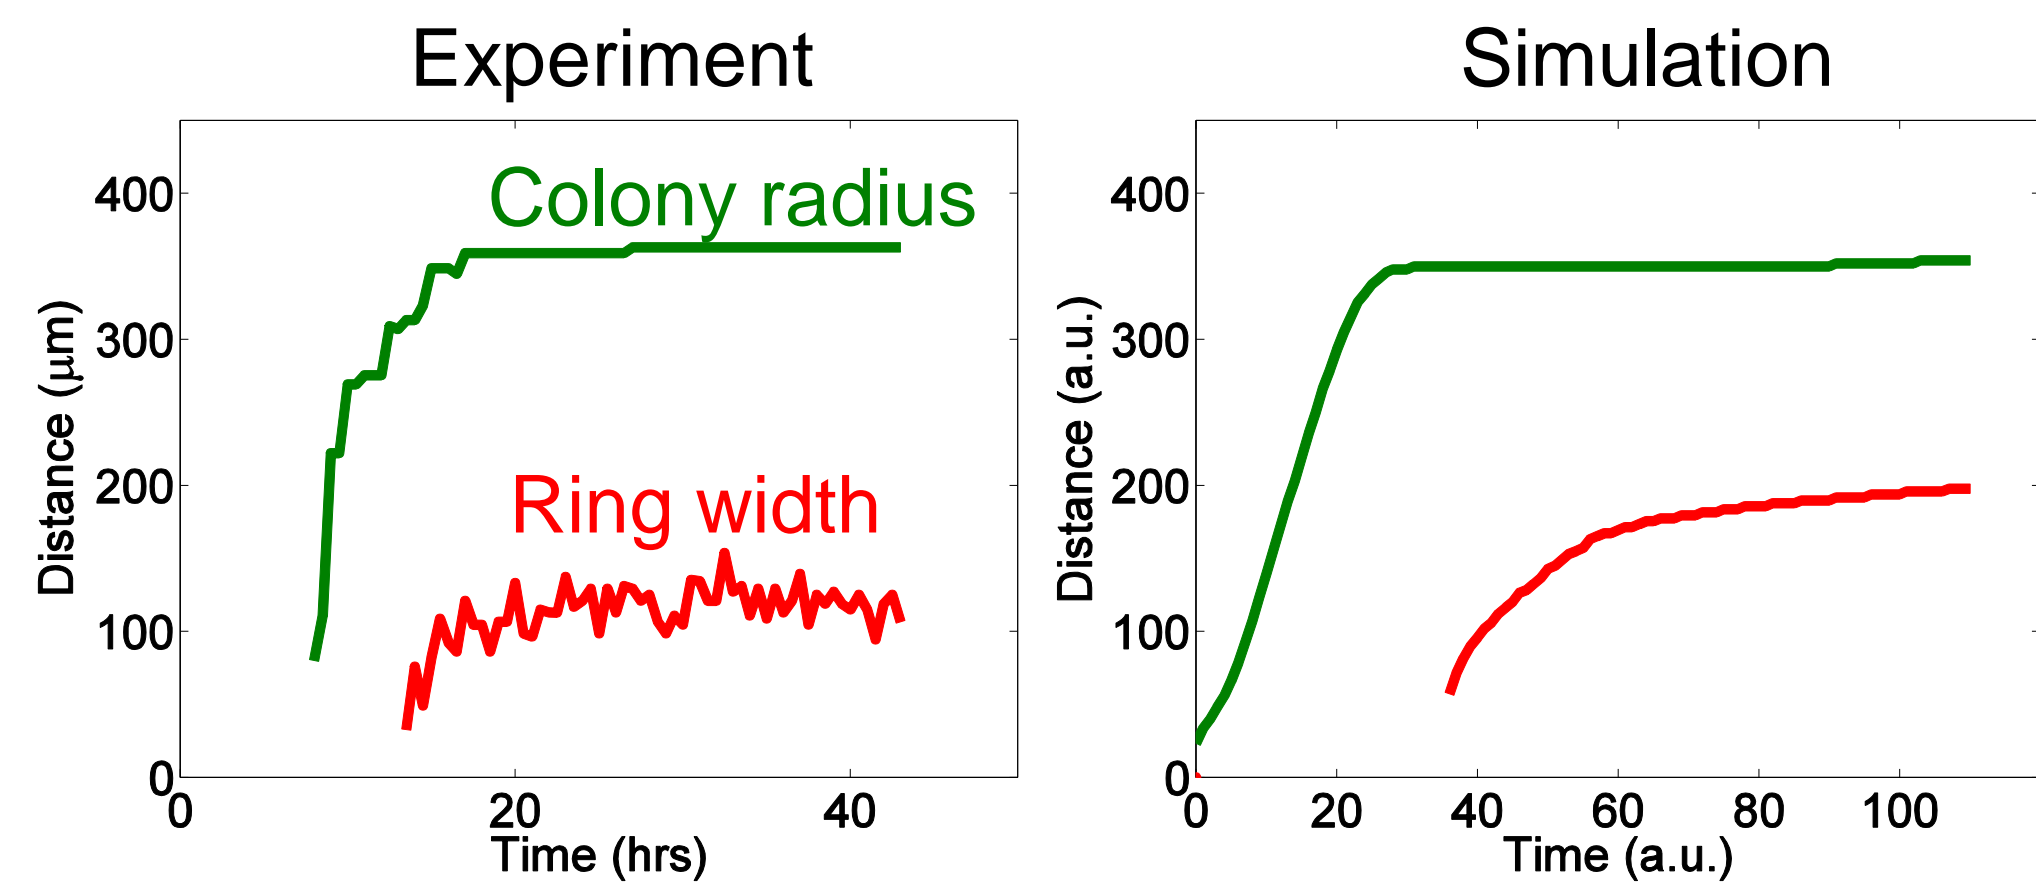

Supplement: NIHMS767510-supplement-3.pdf [file NIHMS767510-supplement-3.pdf]

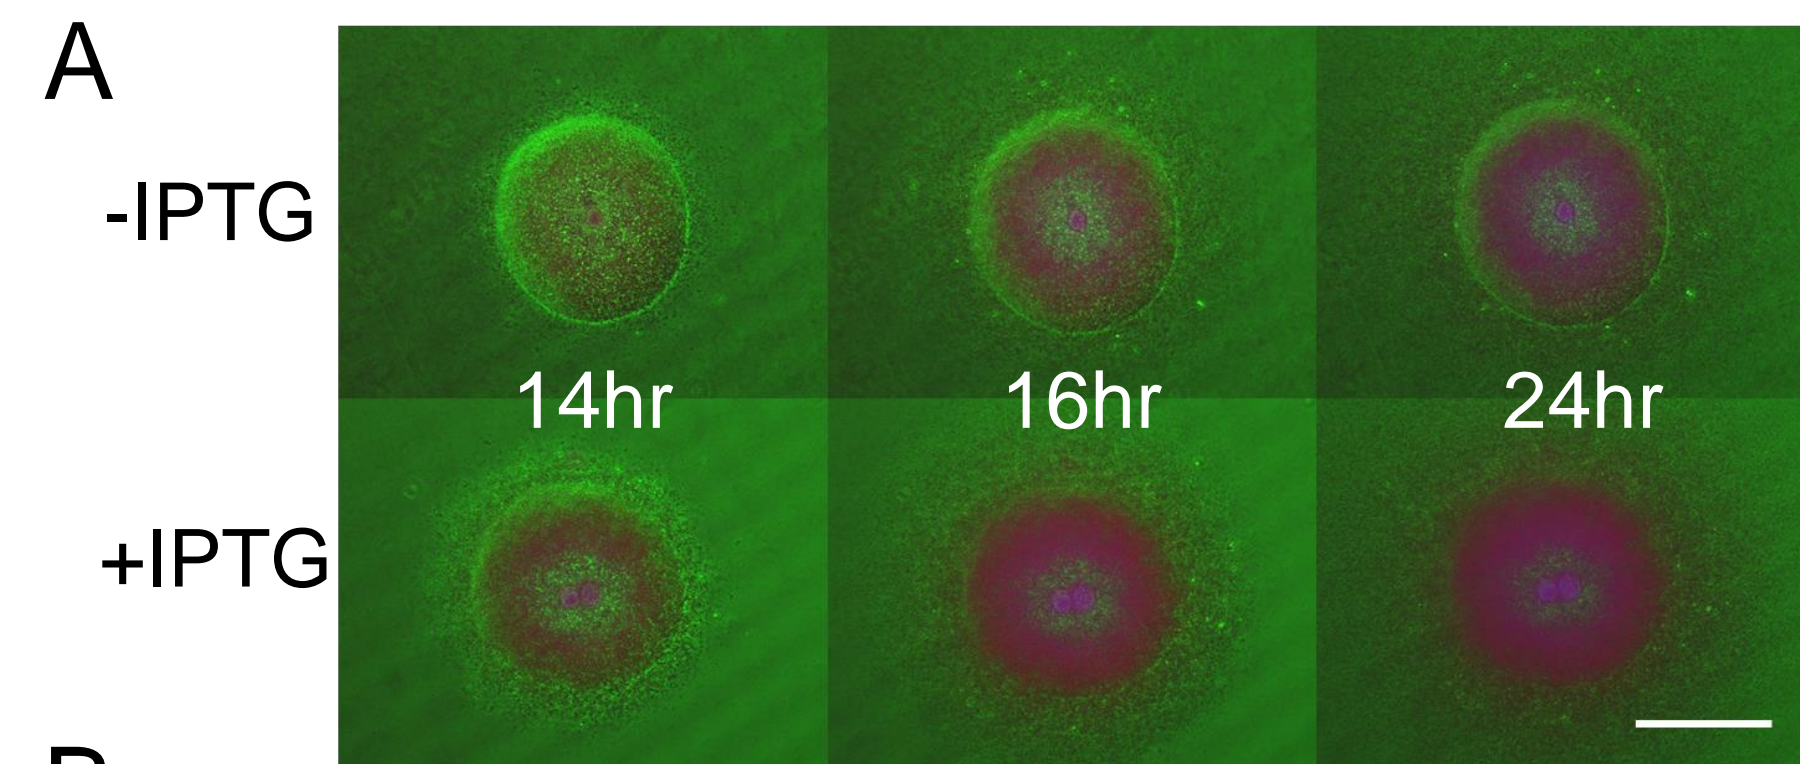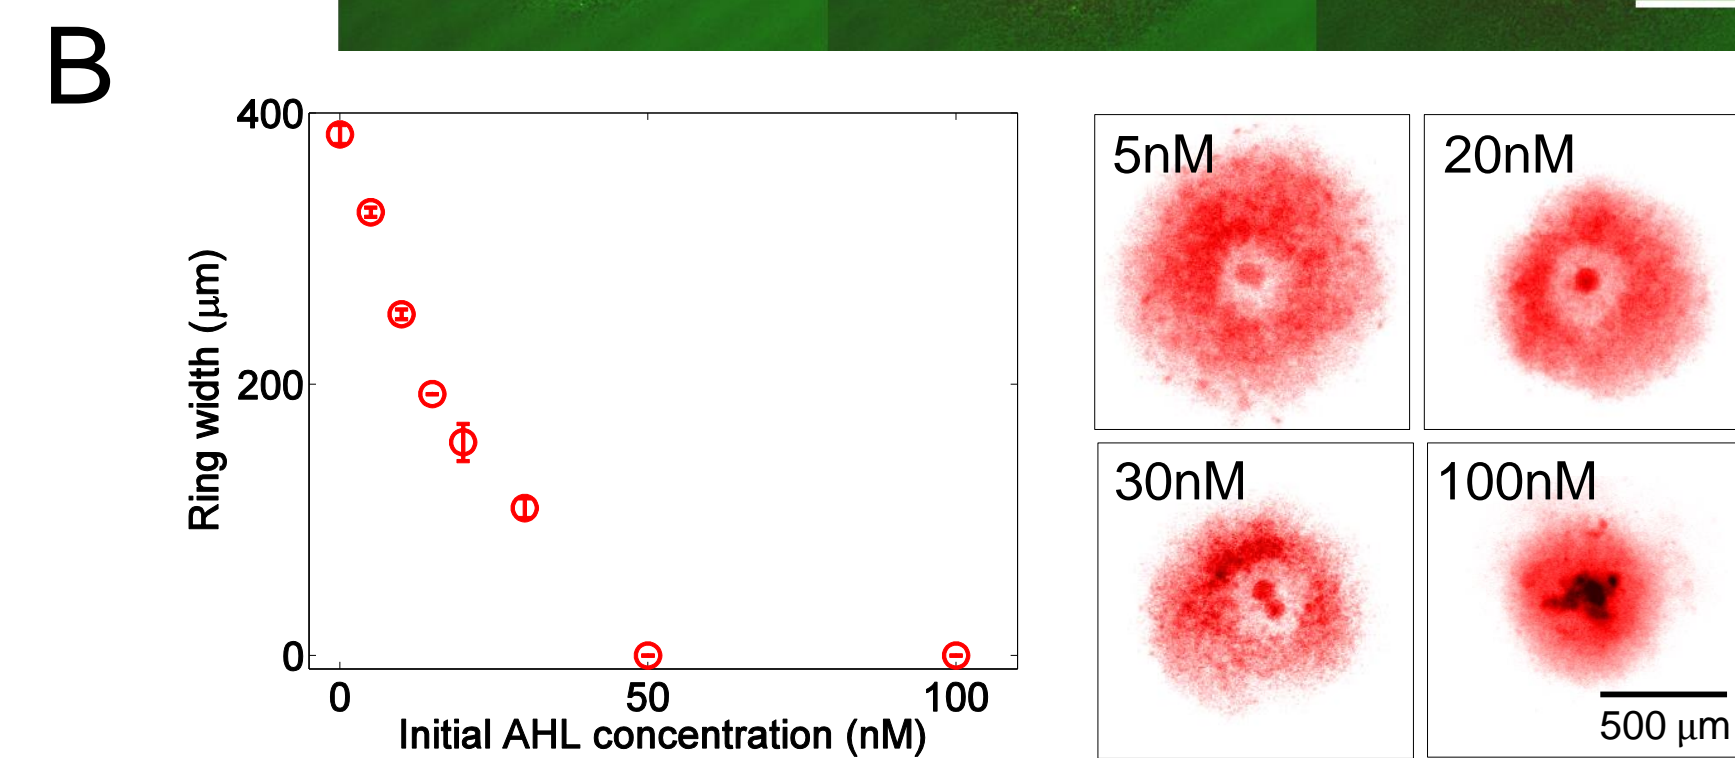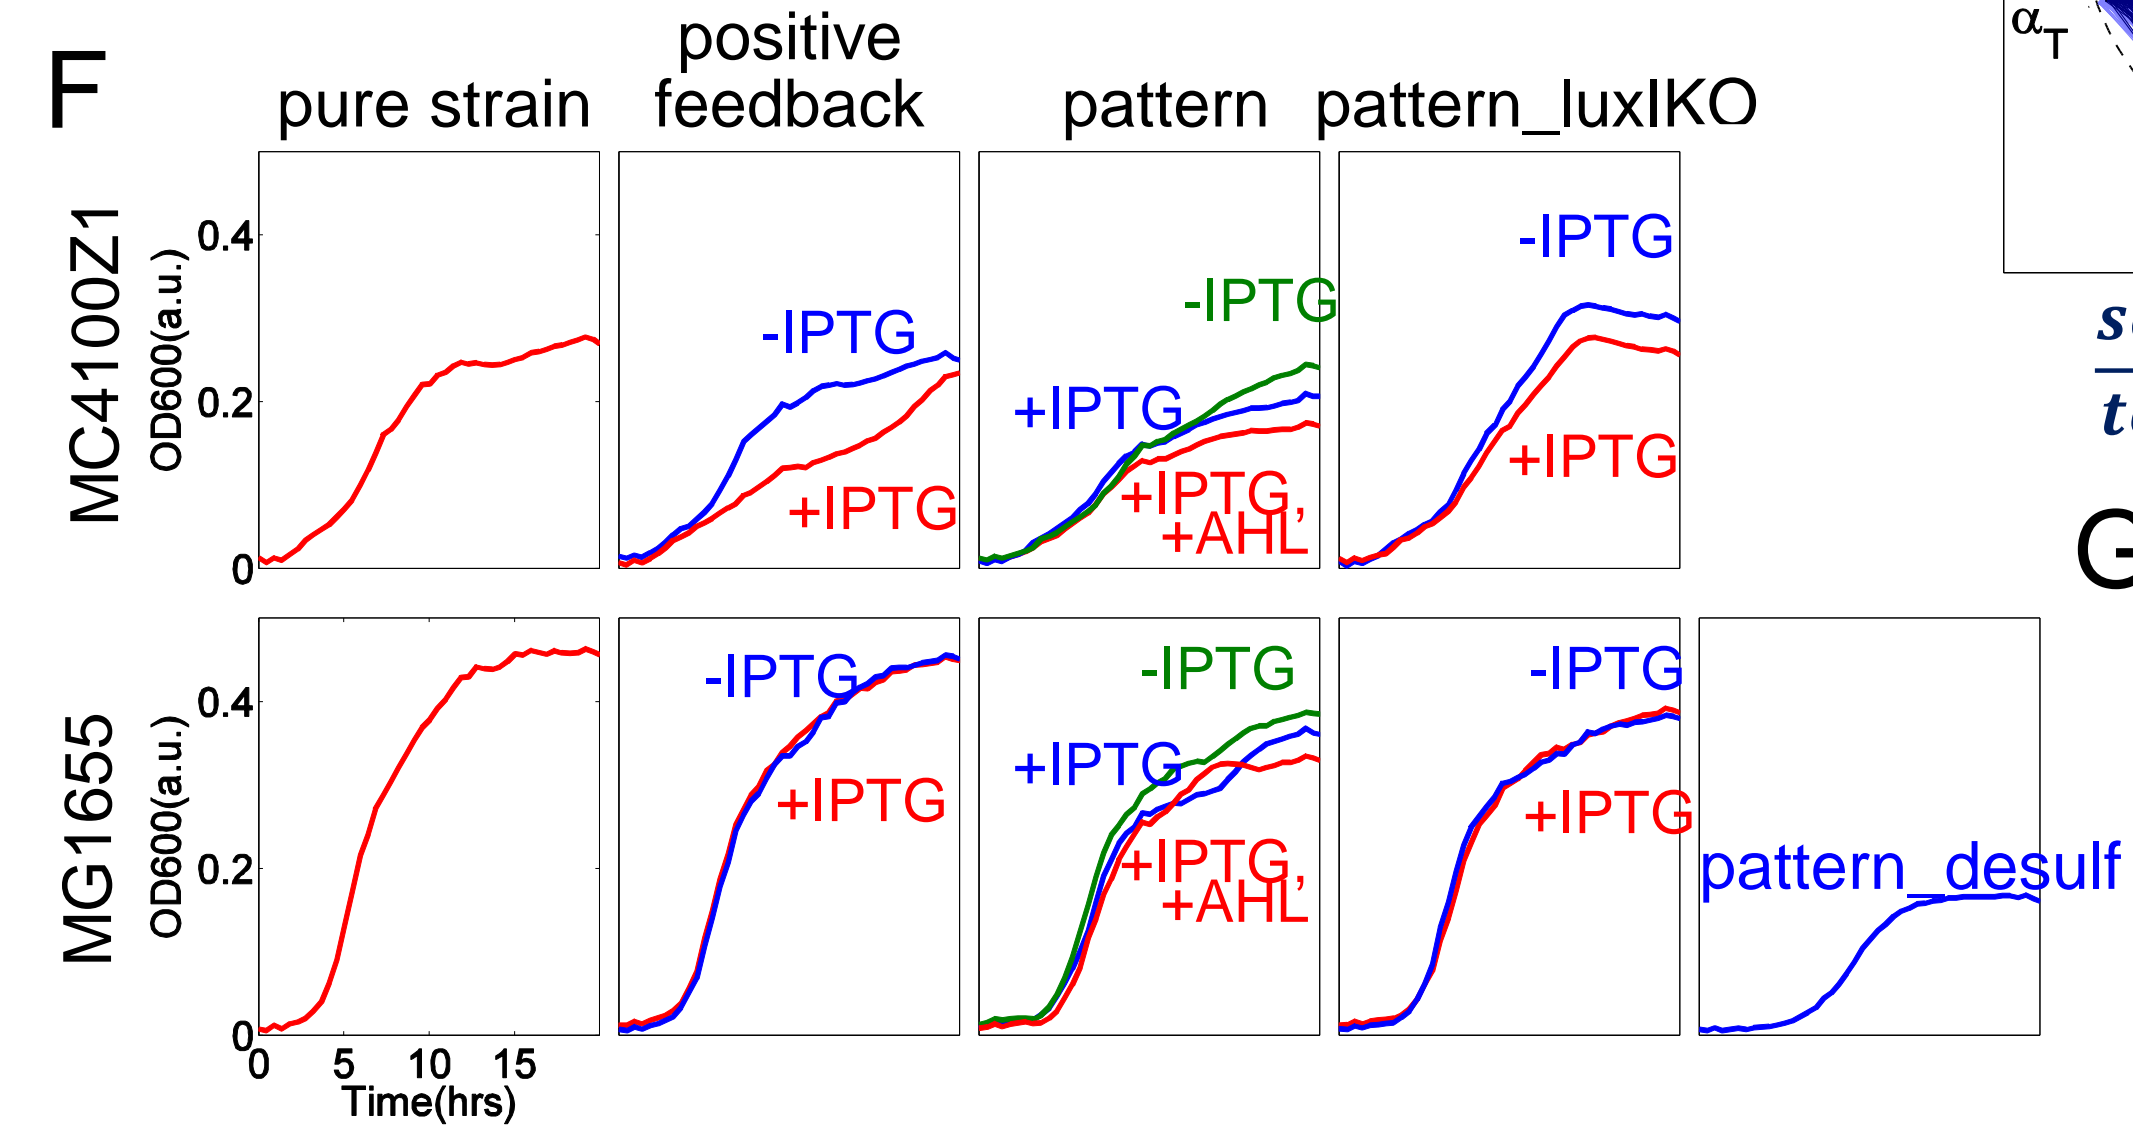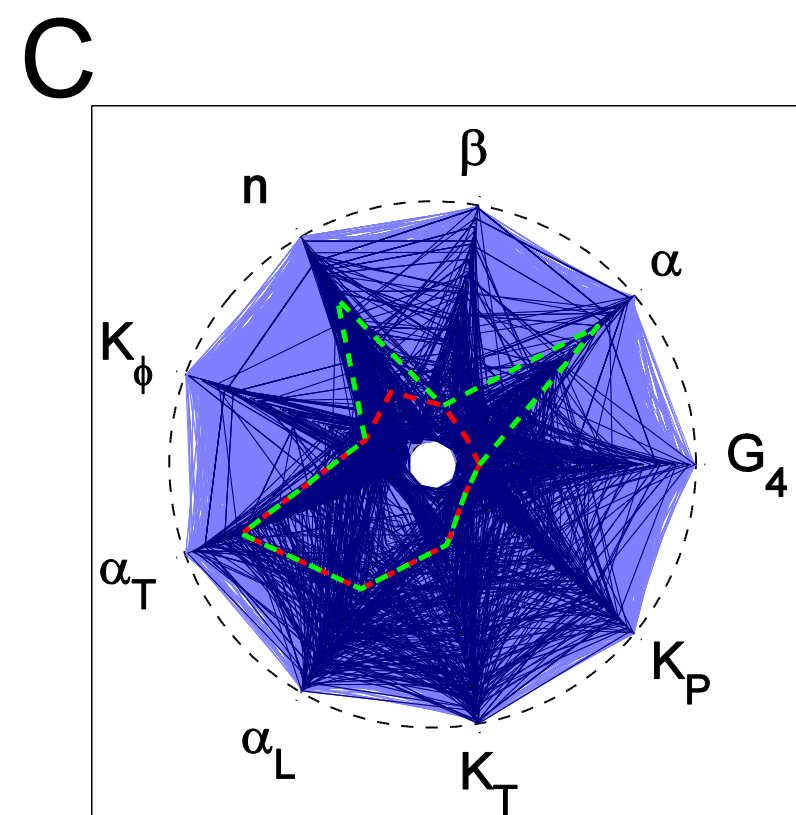

$$\frac{\text{scale sets}}{\text{total sets}} = \frac{55}{18,231}$$

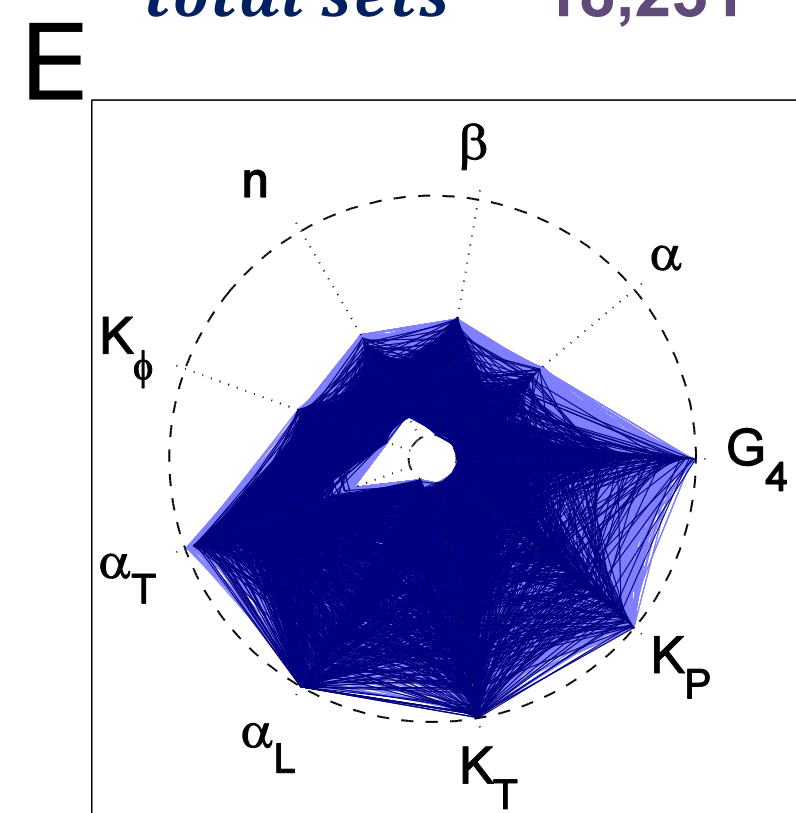

$$\frac{\text{scale sets}}{\text{total sets}} = \frac{784}{6039}$$

**G**

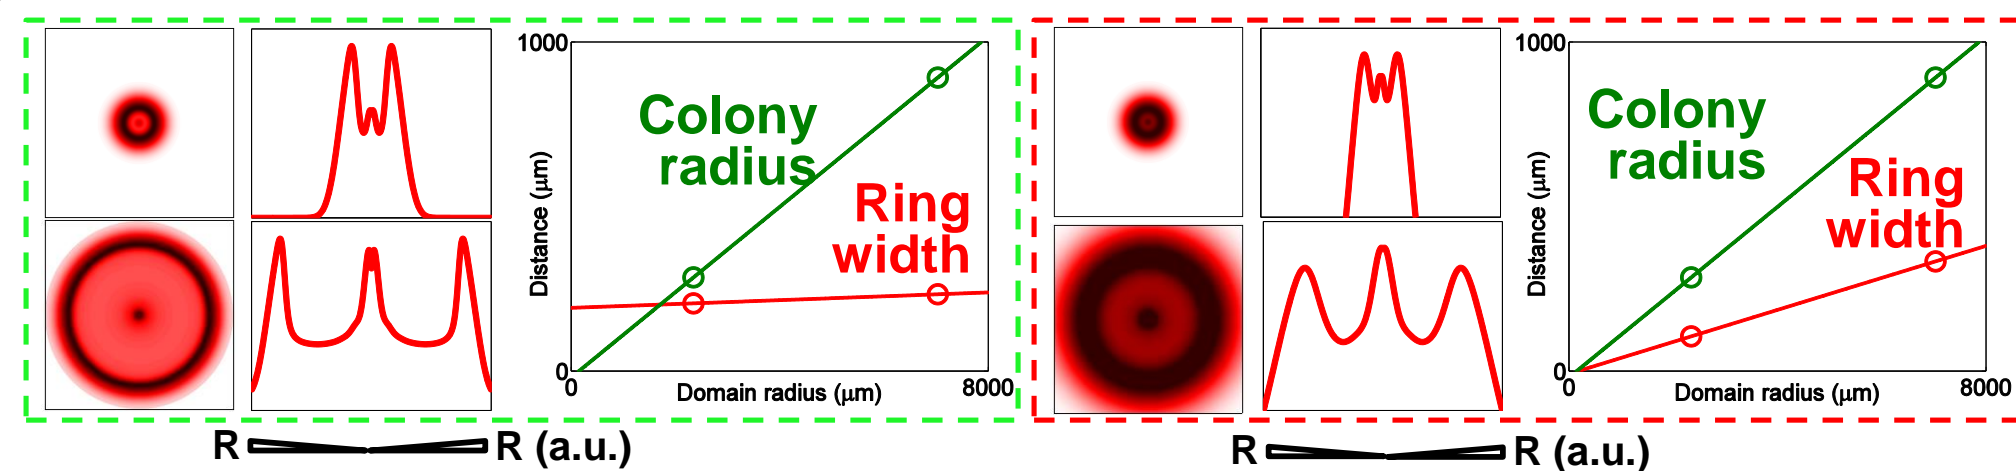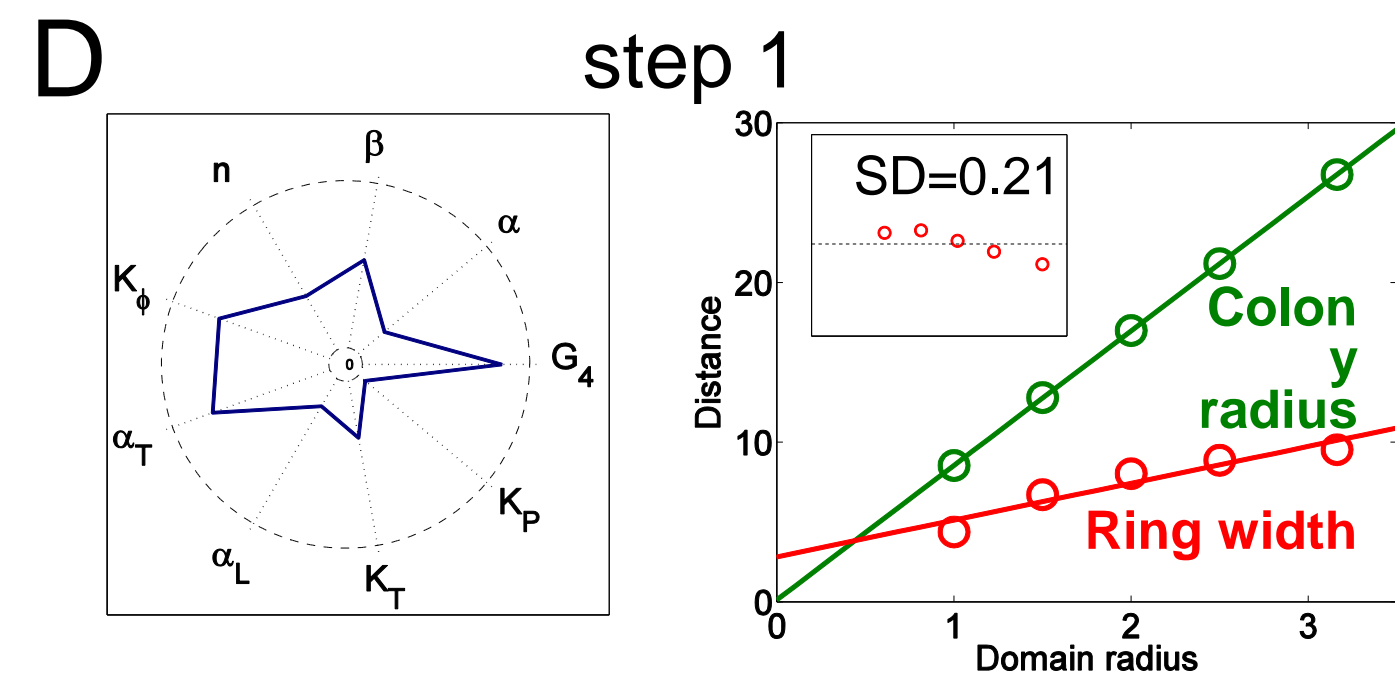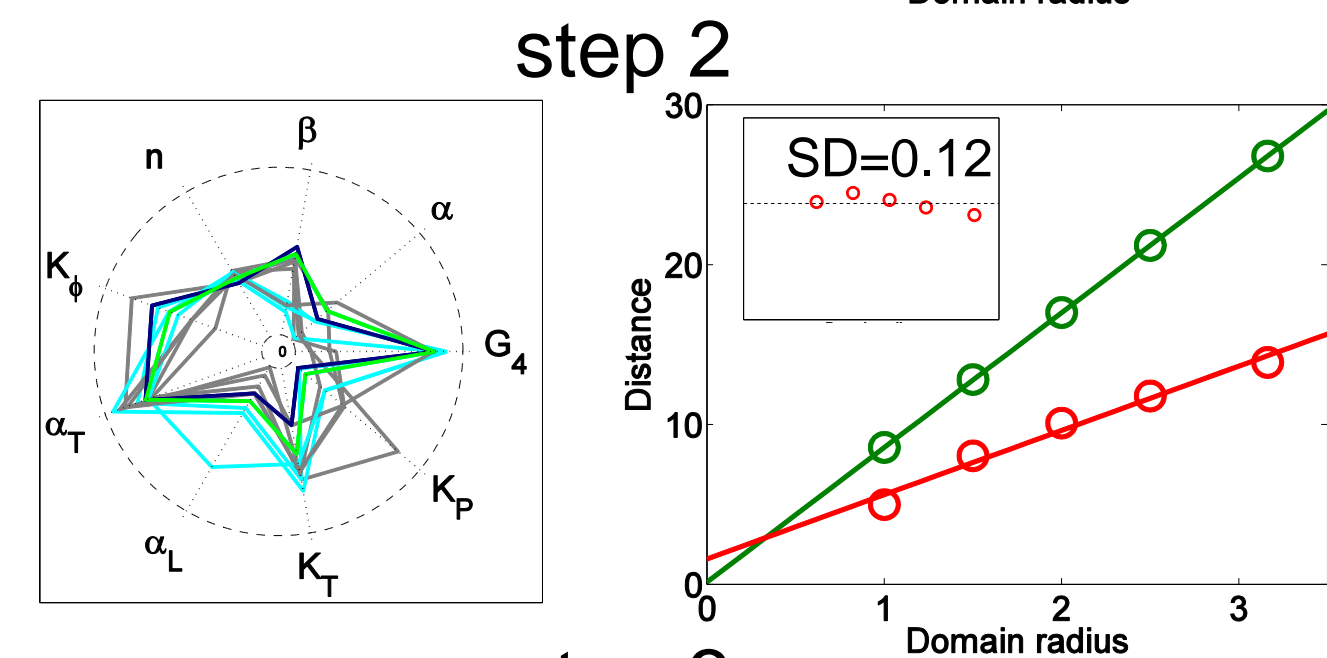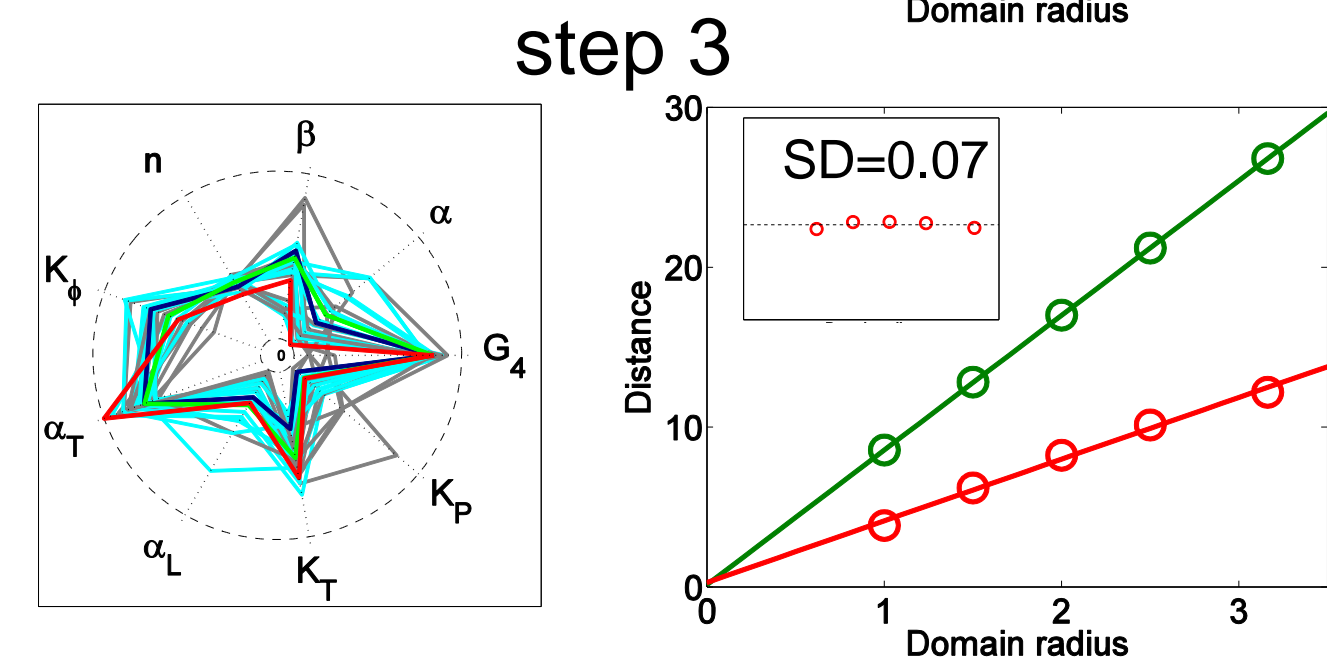

Supplement: NIHMS767510-supplement-4.pdf [file NIHMS767510-supplement-4.pdf]

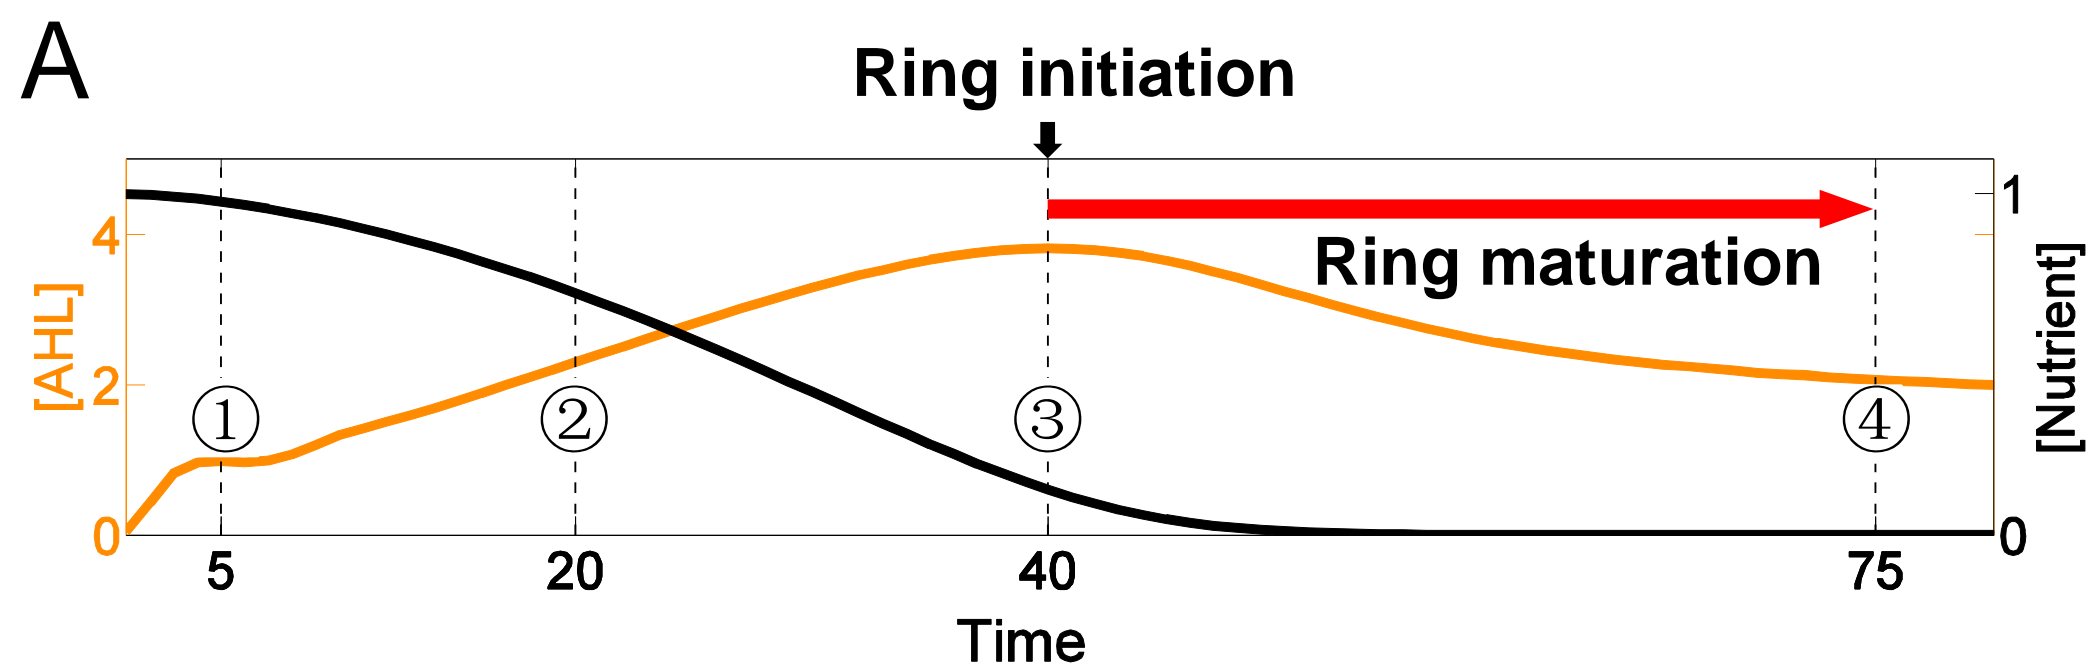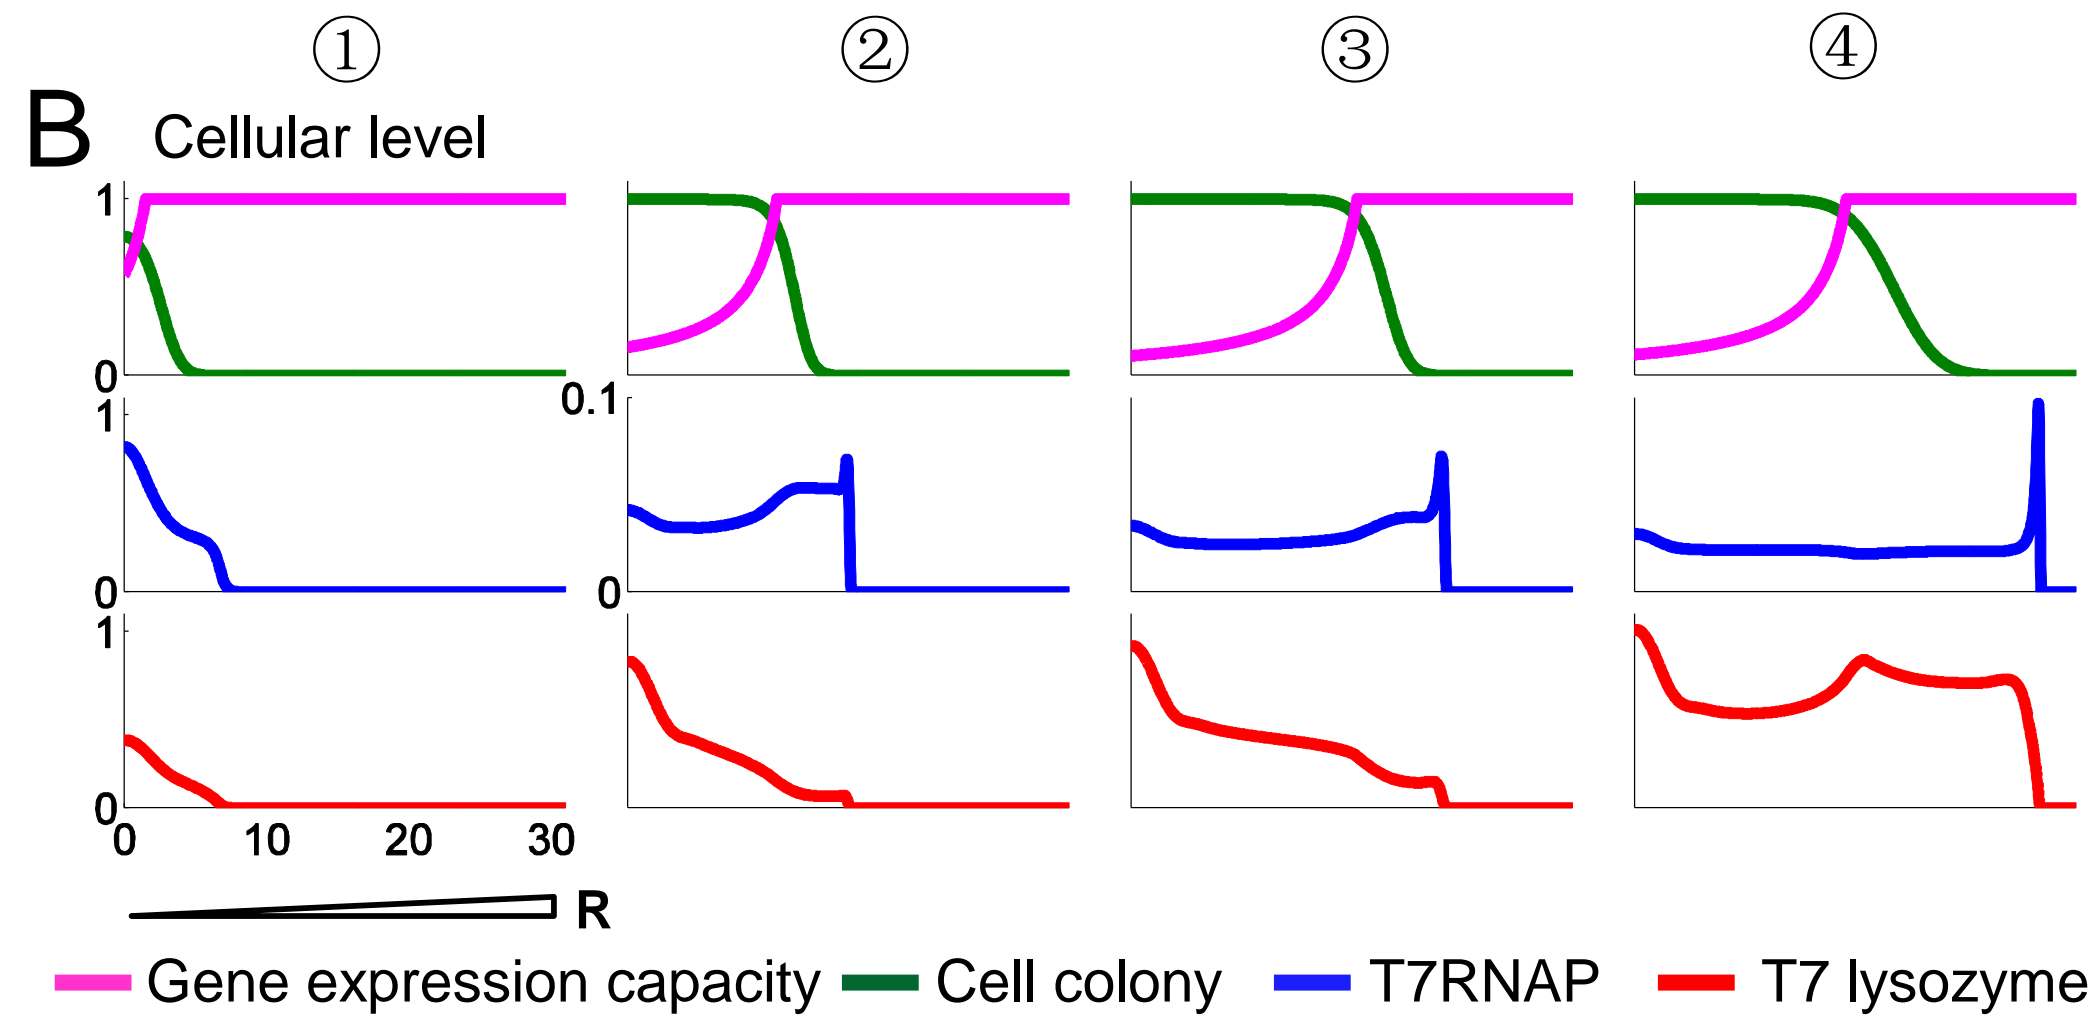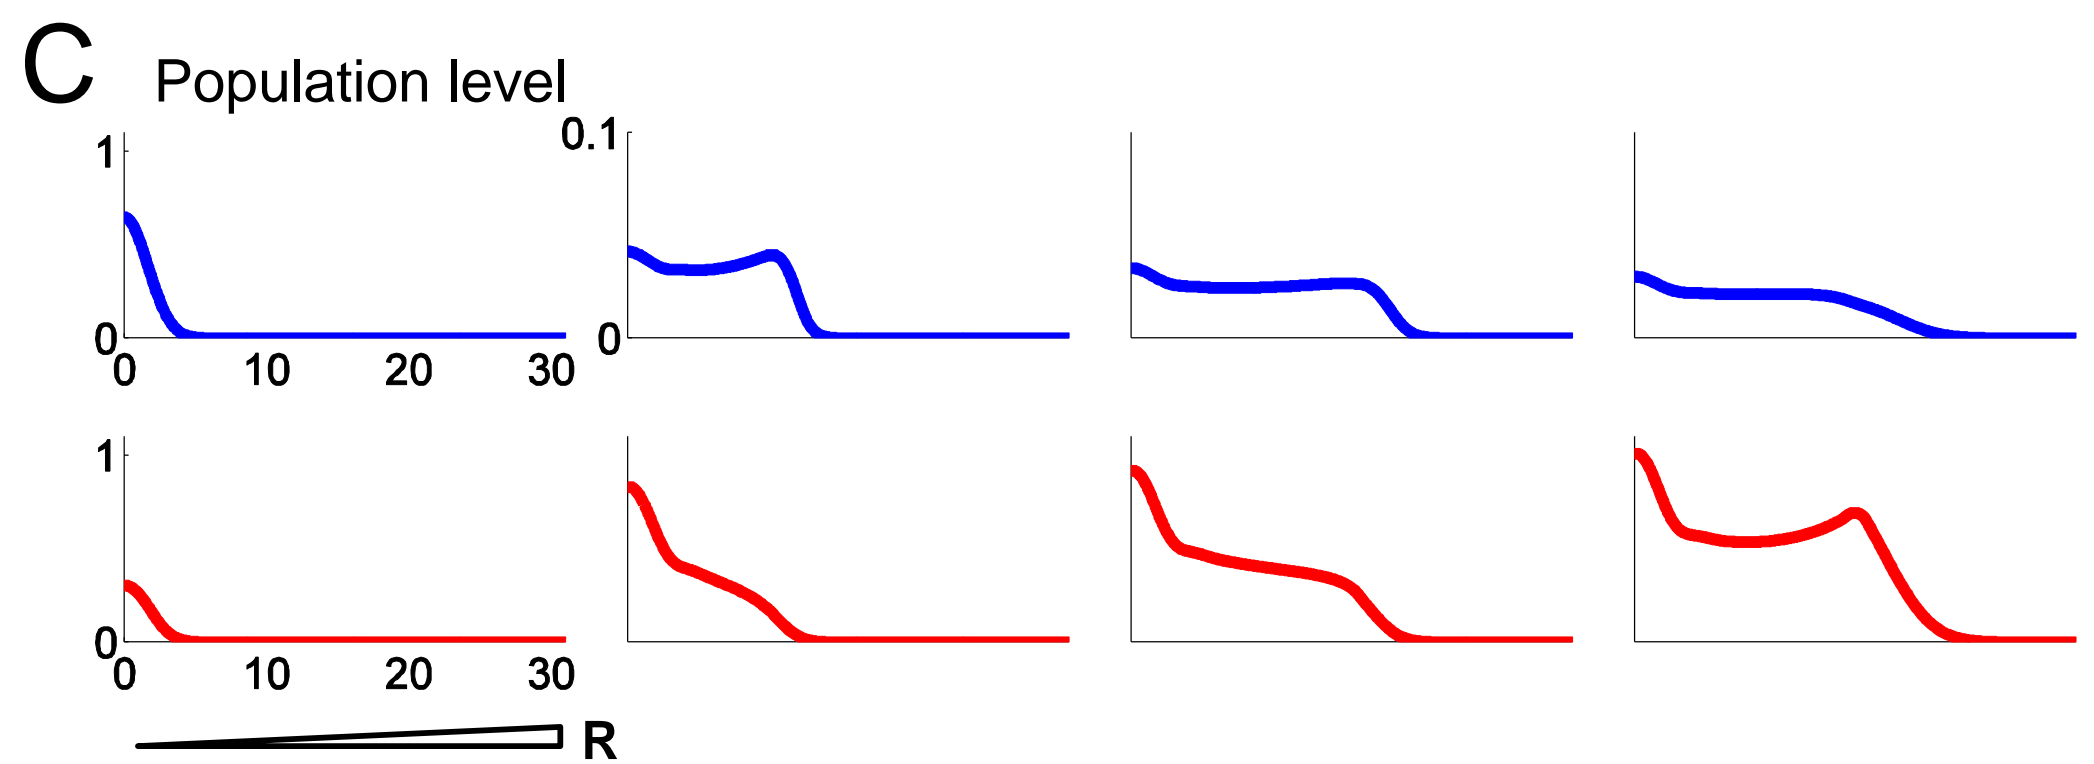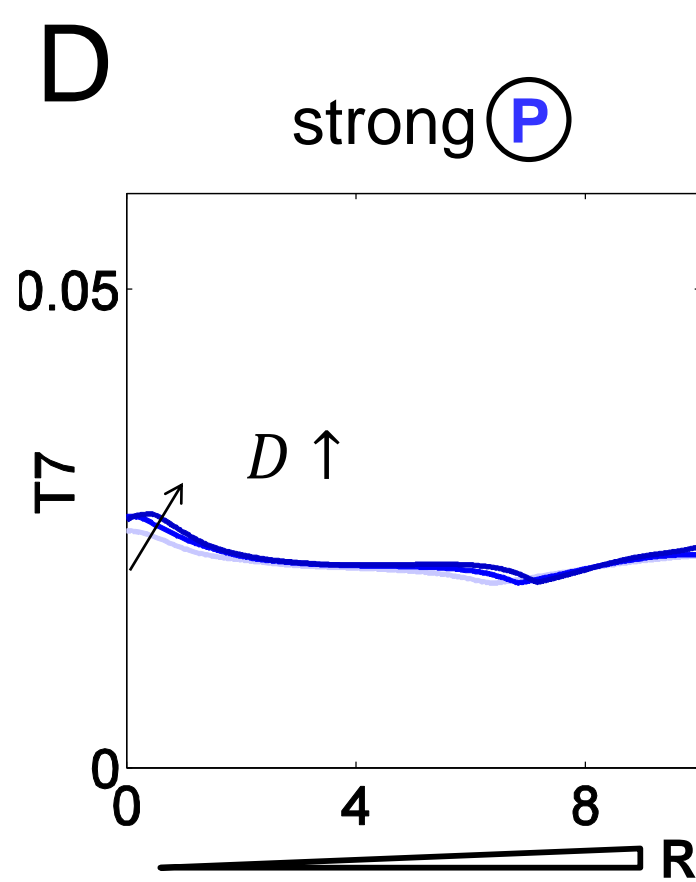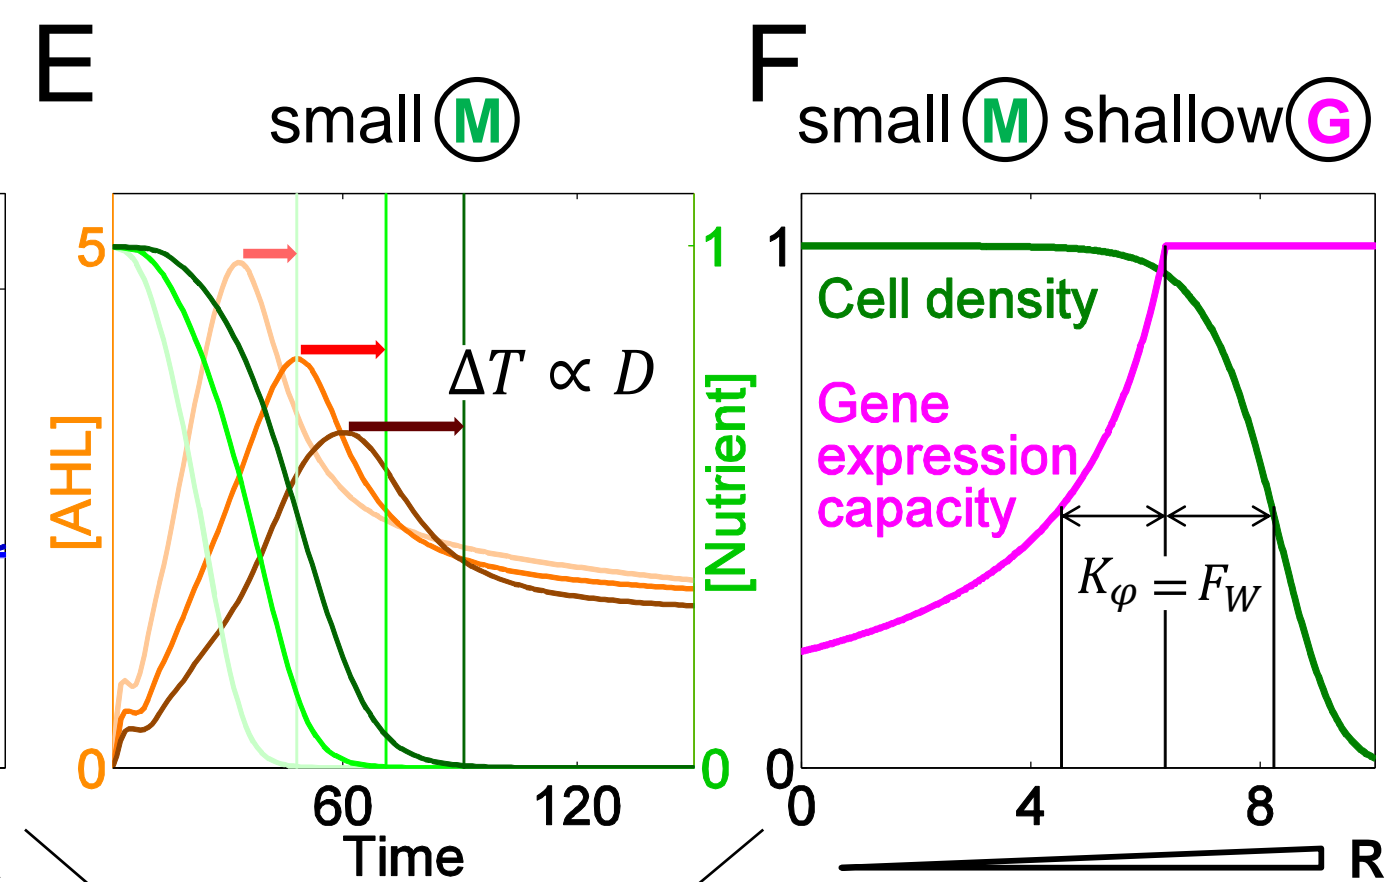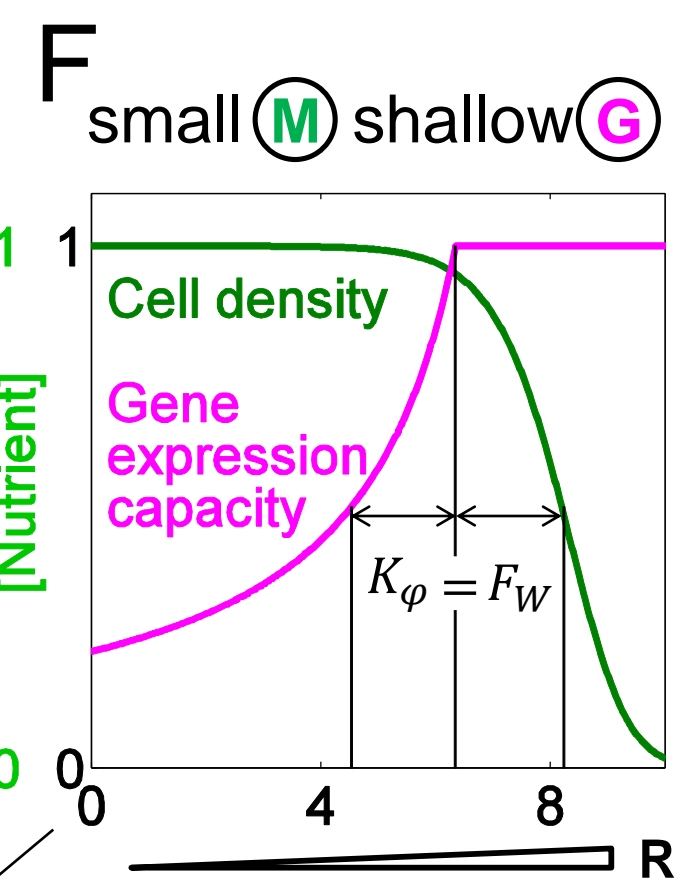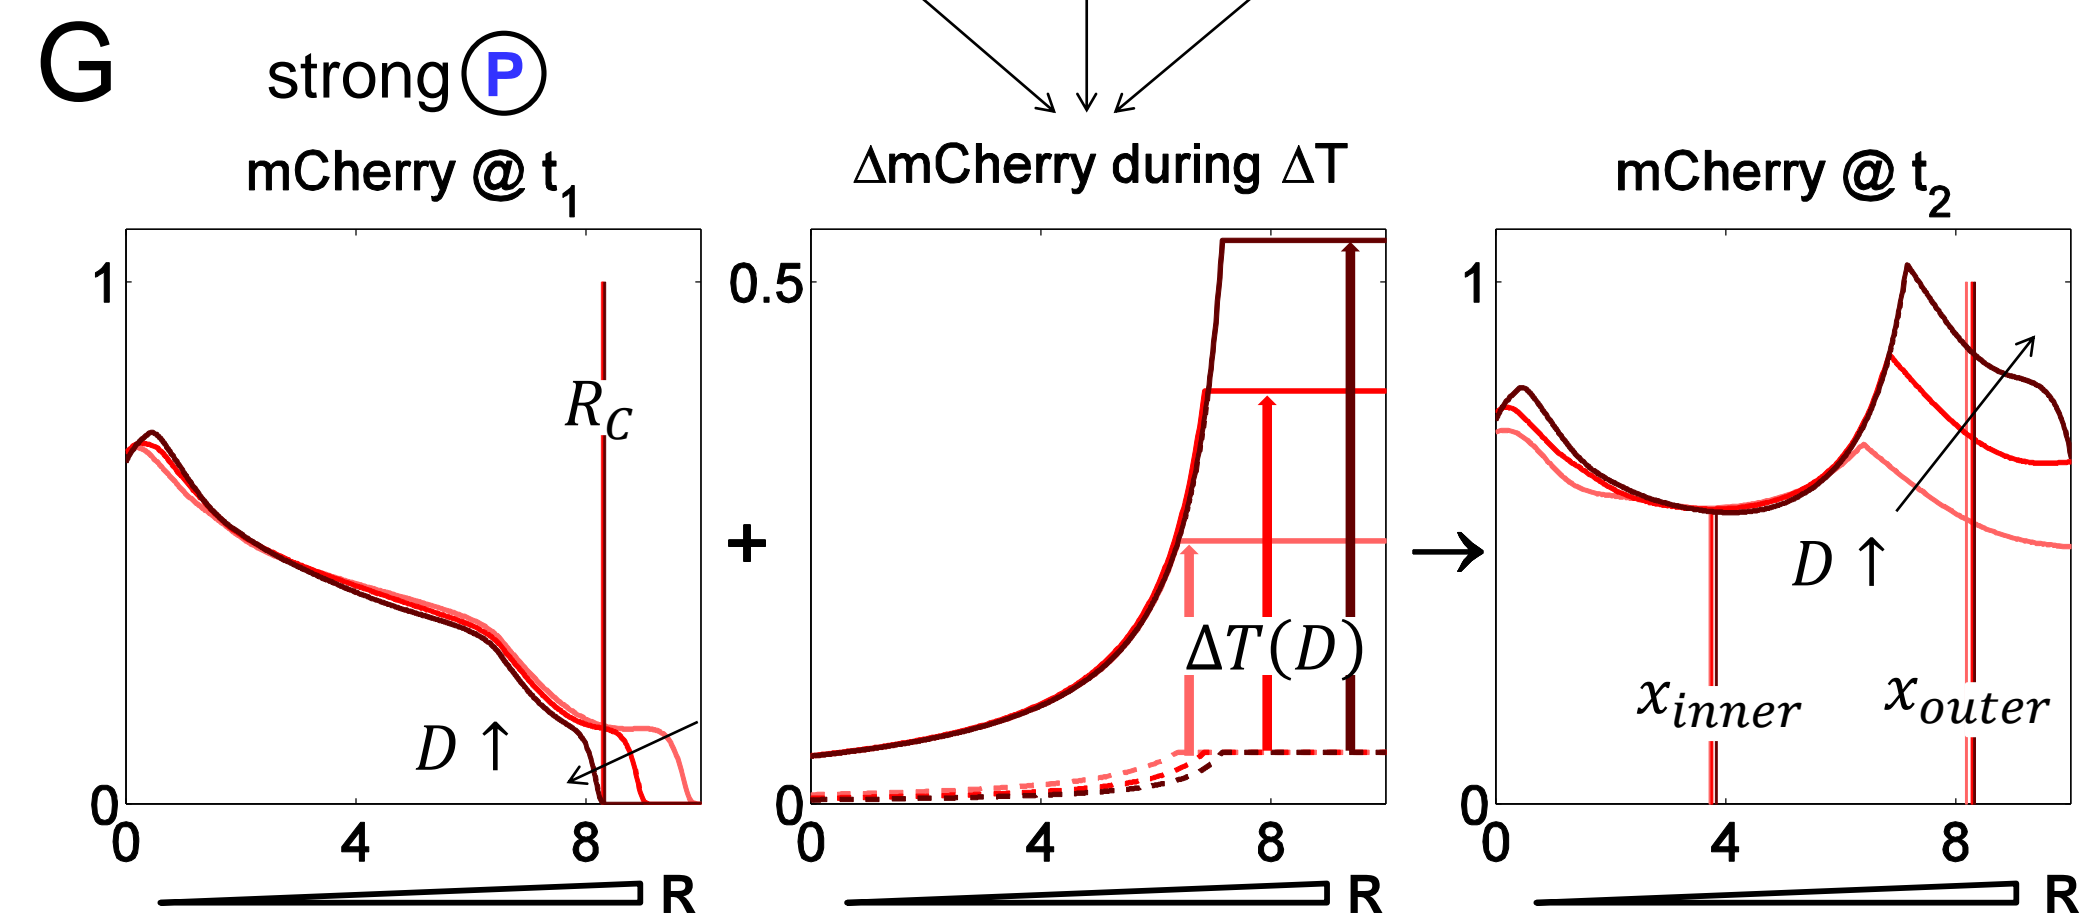

Supplement: NIHMS767510-supplement-5.pdf [file NIHMS767510-supplement-5.pdf]

# Weak positive feedback

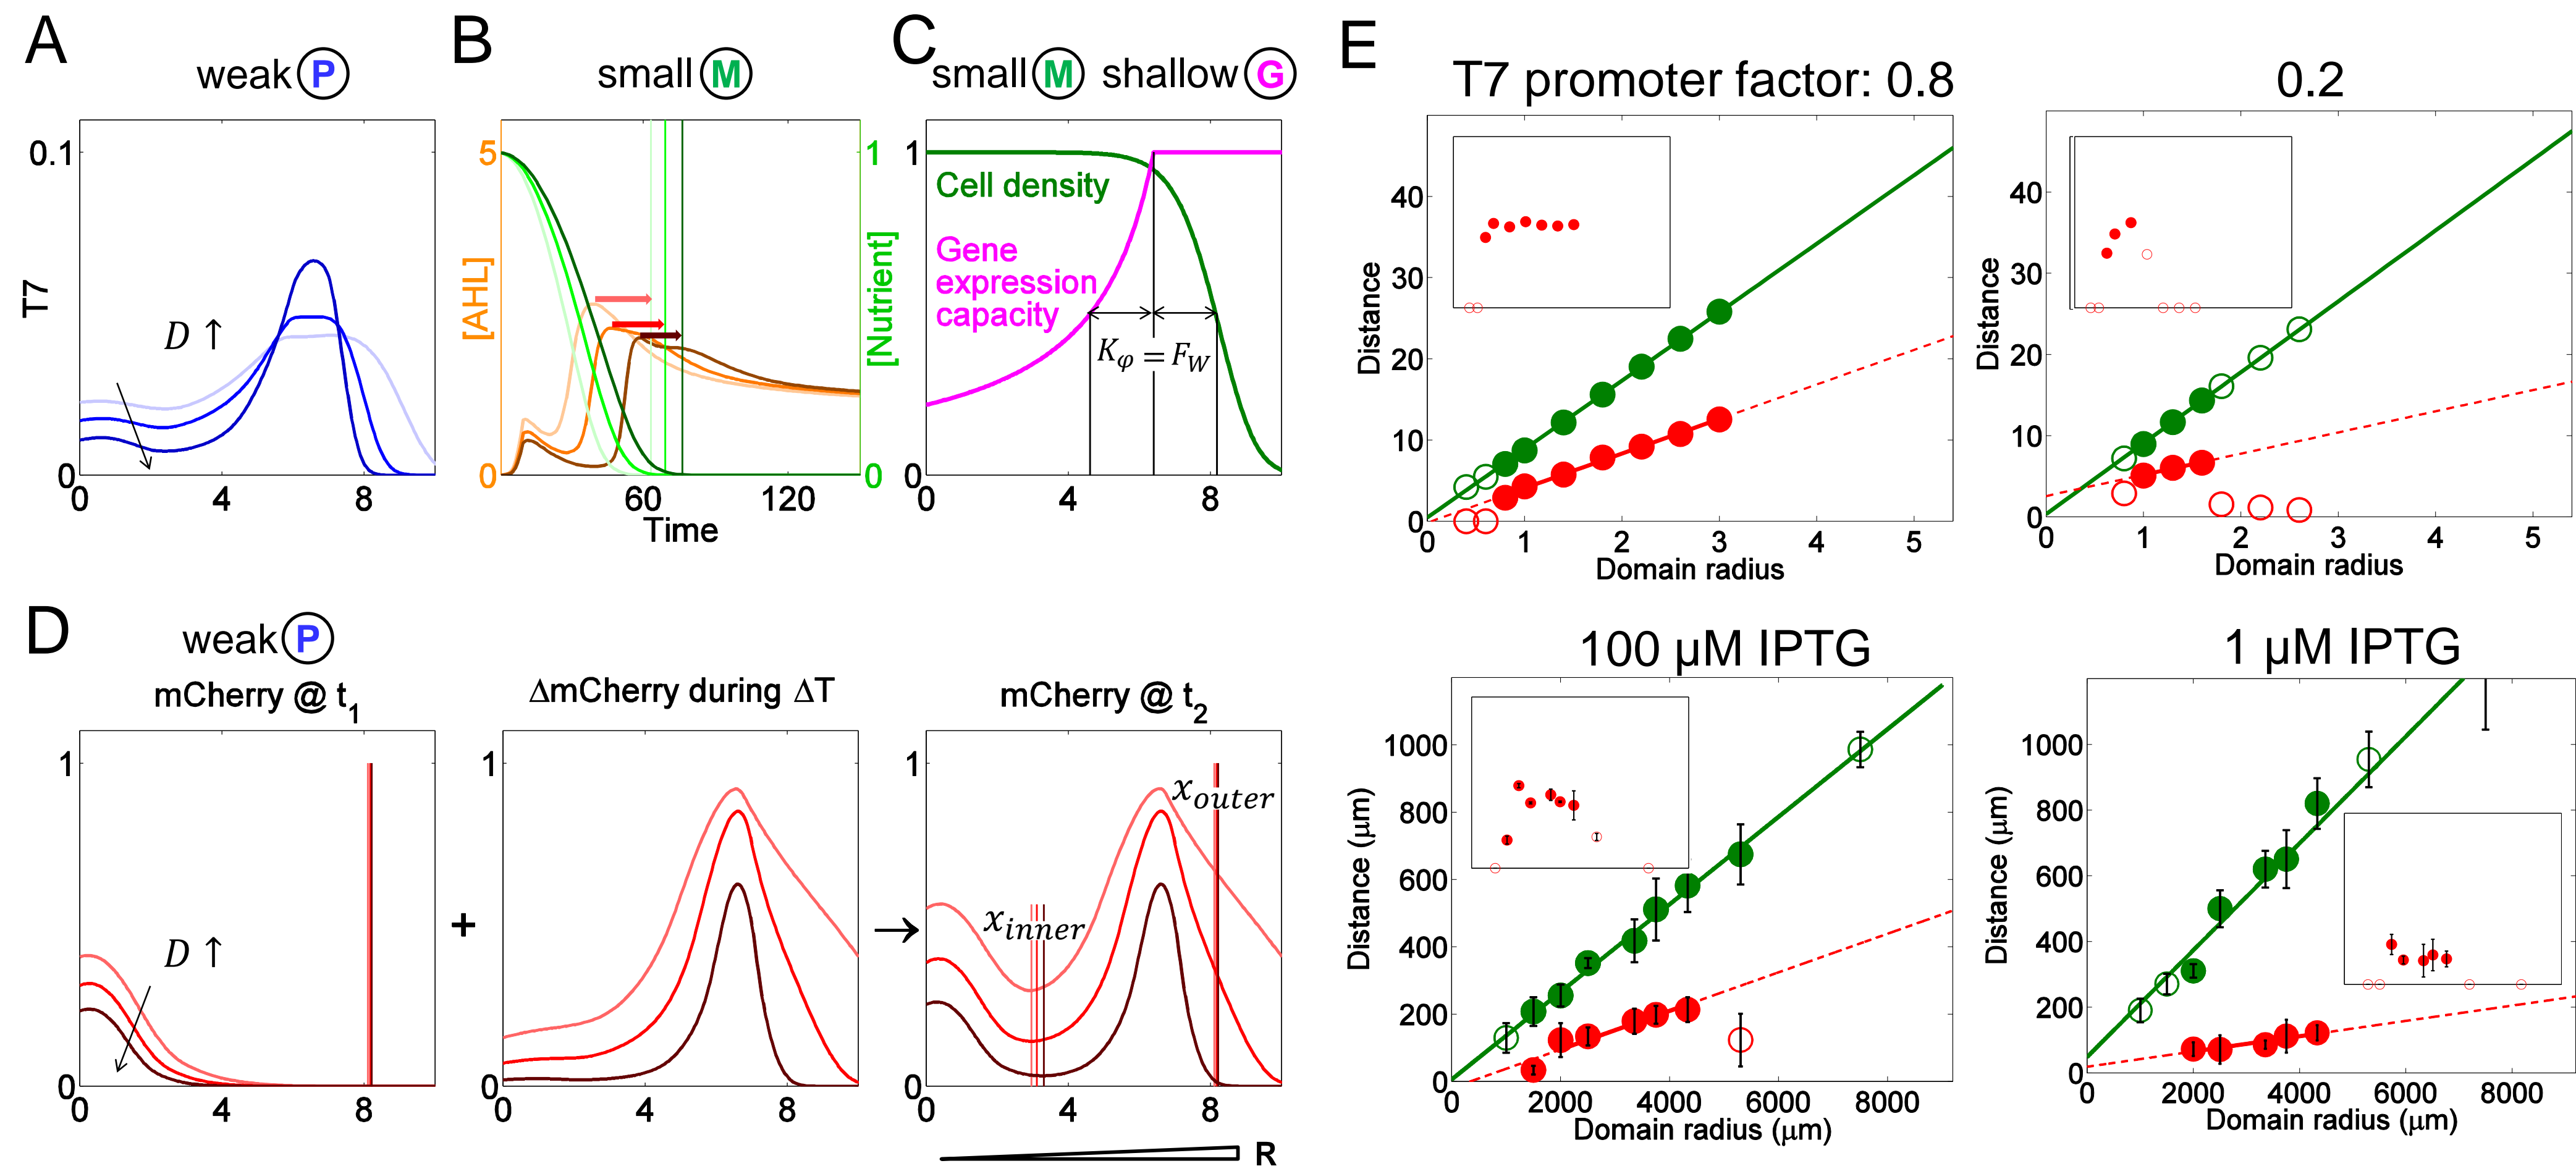

Supplement: NIHMS767510-supplement-7.pdf [file NIHMS767510-supplement-7.pdf]
